# Supplementary material for: Boosting the energy density of supercapacitors by encapsulating a multi-shelled zinc–cobalt-selenide hollow nanosphere cathode and a yolk–double shell cobalt–iron-selenide hollow nanosphere anode in a graphene network
Source: Royal Society of Chemistry journal article supplement (doi:10.1039/d0nr02642e), 2020-01-01
Supplement: d0nr02642e1.pdf [file d0nr02642e1.pdf]

## Supporting Information

### Boosting the energy density of supercapacitors by encapsulating multi-shelled zinc-cobalt-selenide hollow nanospheres cathode and yolk-double shell cobalt-iron-selenide hollow nanospheres anode in graphene network

Akbar Mohammadi Zardkhoshoui\* and Saied Saeed Hosseiny Davarani\*

Department of Chemistry, Shahid Beheshti University, G. C., 1983963113, Evin, Tehran, Iran.

Corresponding authors: \*Tel: +98 21 22431661; Fax: +98 21 22431661; E-mail: [ss-hosseiny@sbu.ac.ir](mailto:ss-hosseiny@sbu.ac.ir) (S.S.H. Davarani); and [mohammadi.bahadoran@gmail.com](mailto:mohammadi.bahadoran@gmail.com) (A. Mohammadi Zardkhoshoui)

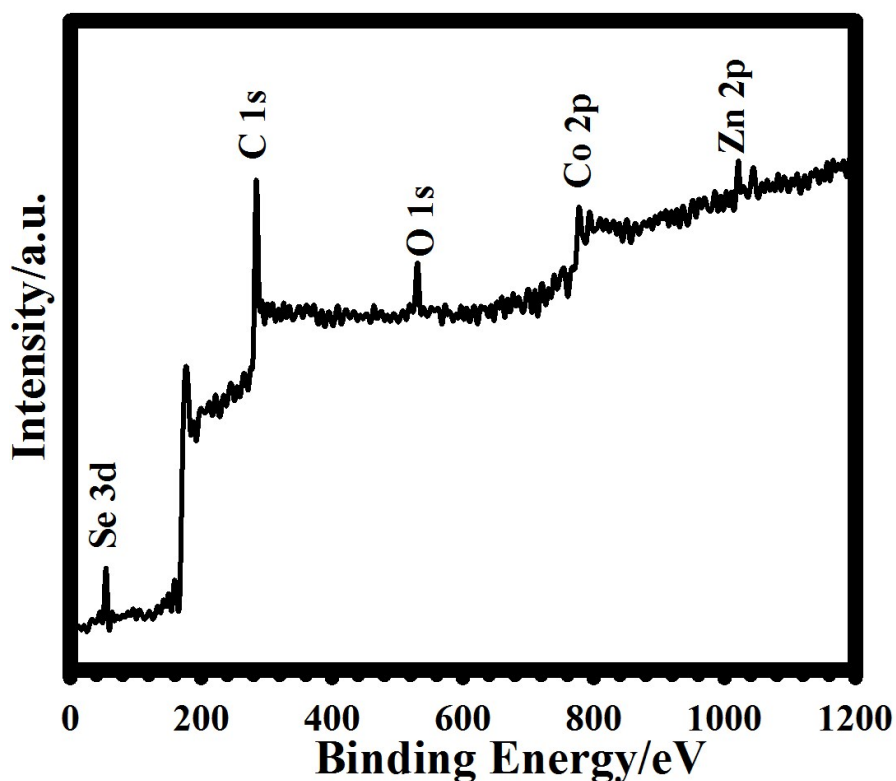

Fig. S1. Survey spectrum of the G/MSZCS-HS.

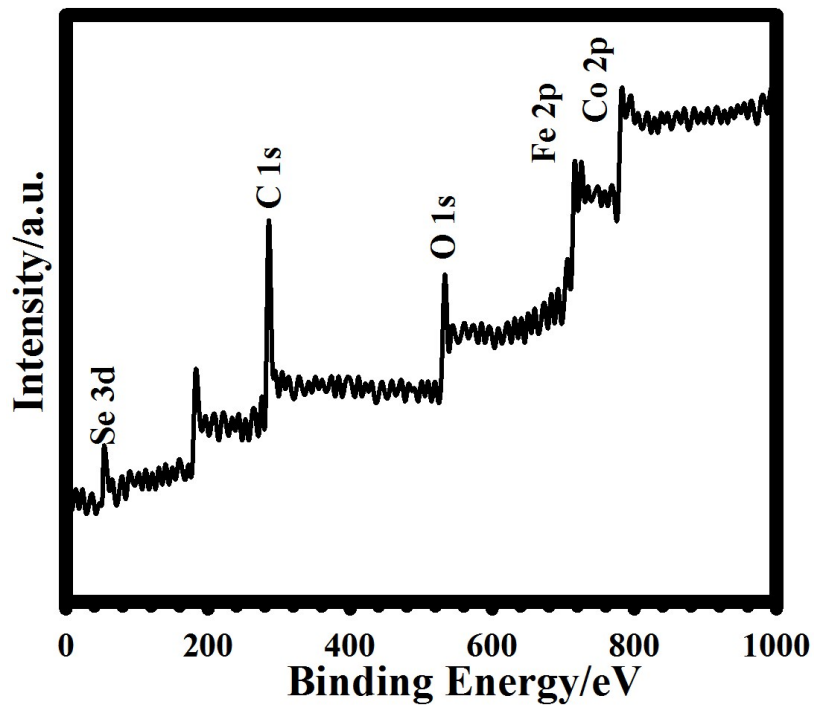

Fig. S2. Survey spectrum of the G/YDSCFS-HS.

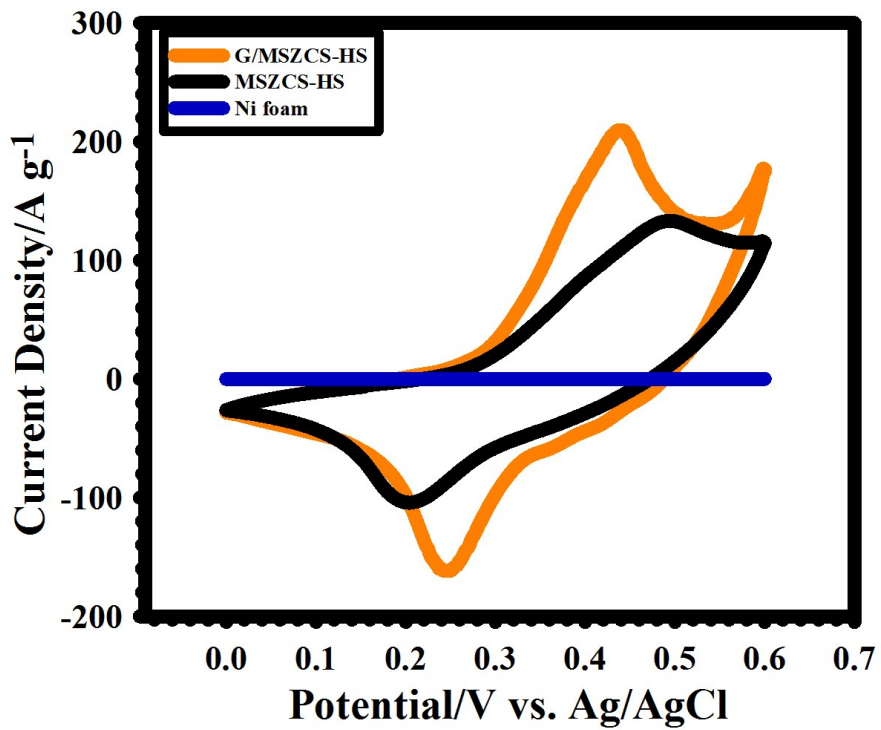

Fig. S3. CV graphs of bare NF, MSZCS-HS and G/MSZCS-HS electrodes at 60 mV s<sup>-1</sup>.

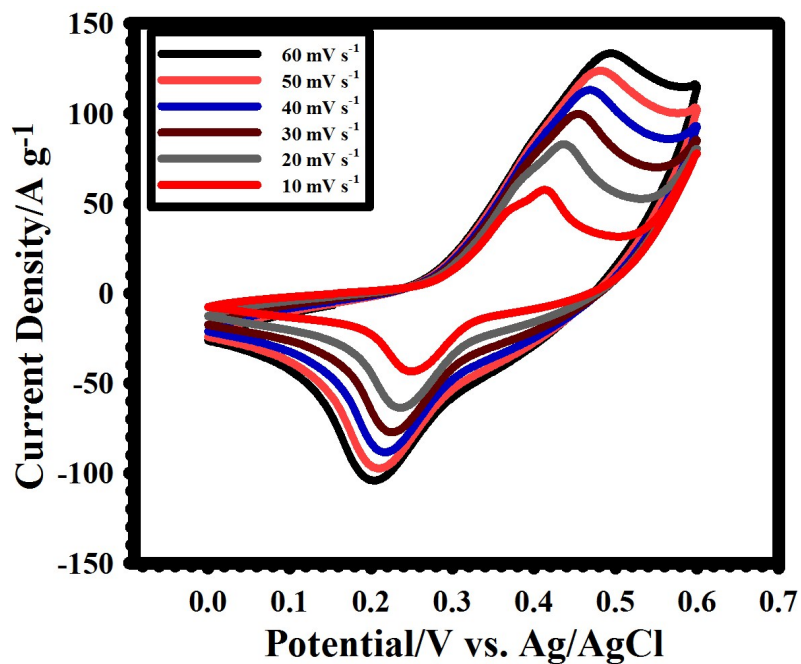

Fig. S4. CV graphs of the MSZCS-HS electrode at various scan rates.

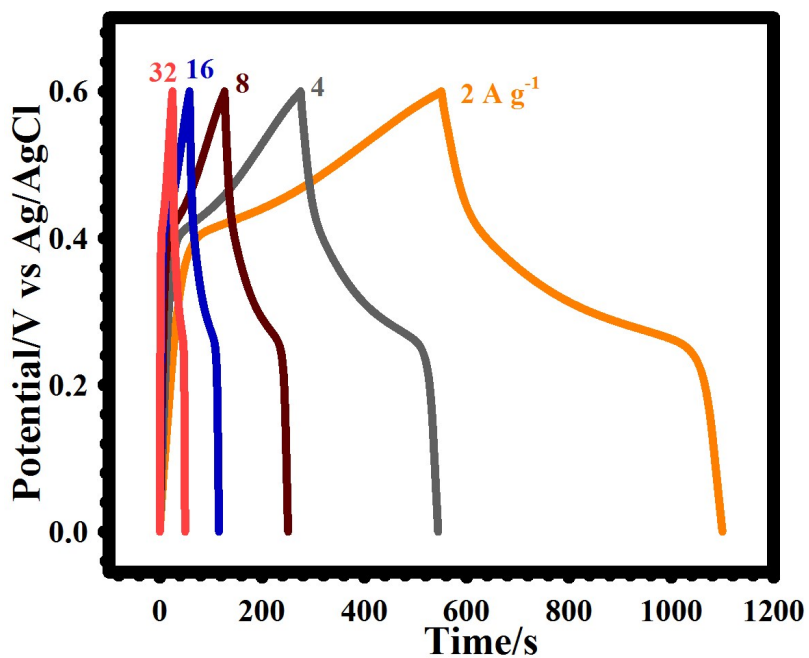

Fig. S5. GCD graphs of the MSZCS-HS electrode at various current densities.

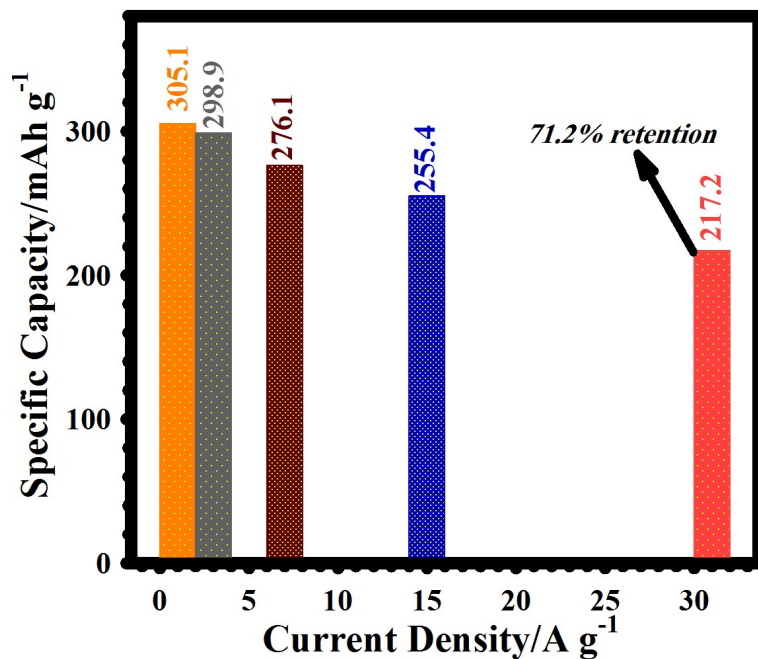

Fig. S6. Rate performance of the MSZCS-HS electrode.

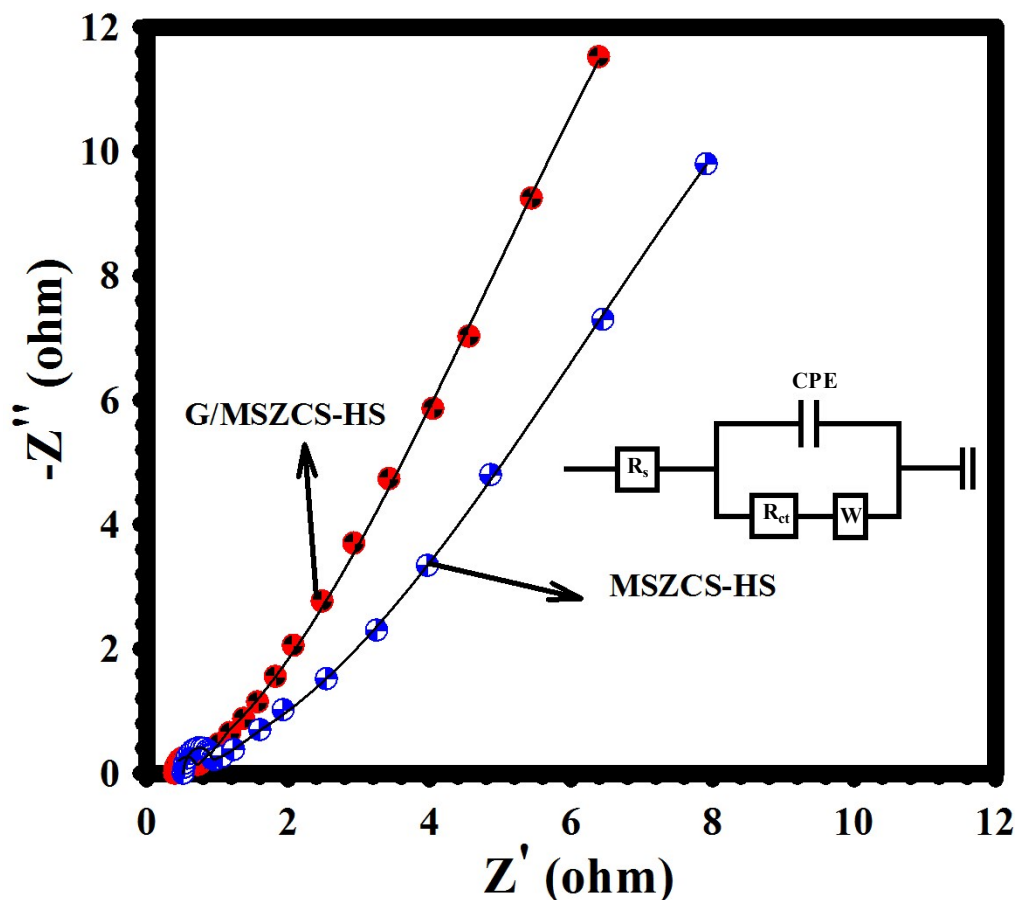

Fig. S7. Nyquist graphs of MSZCS-HS and G/MSZCS-HS electrodes.

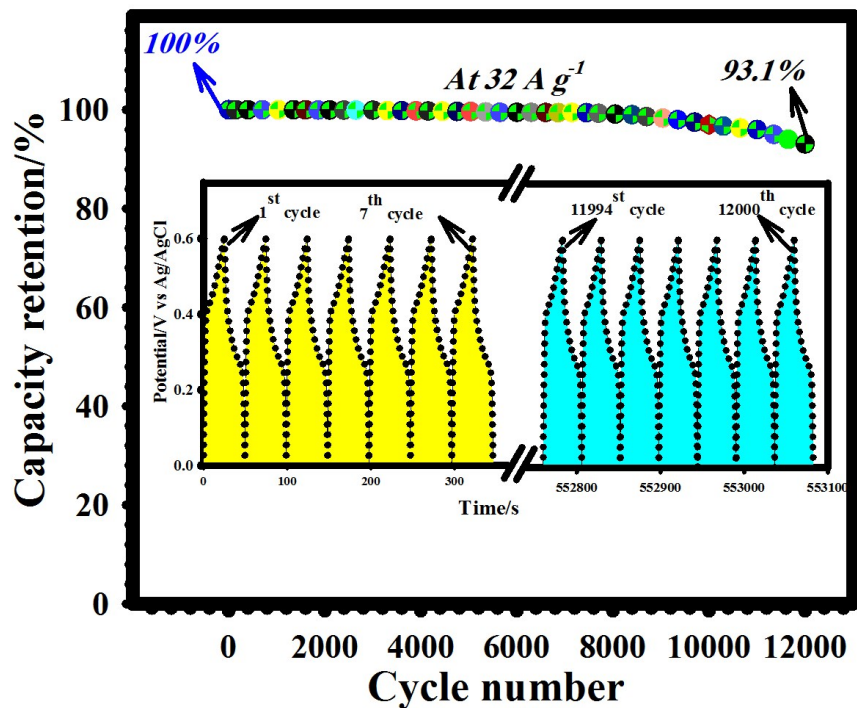

Fig. S8. Durability of the MSZCS-HS electrode.

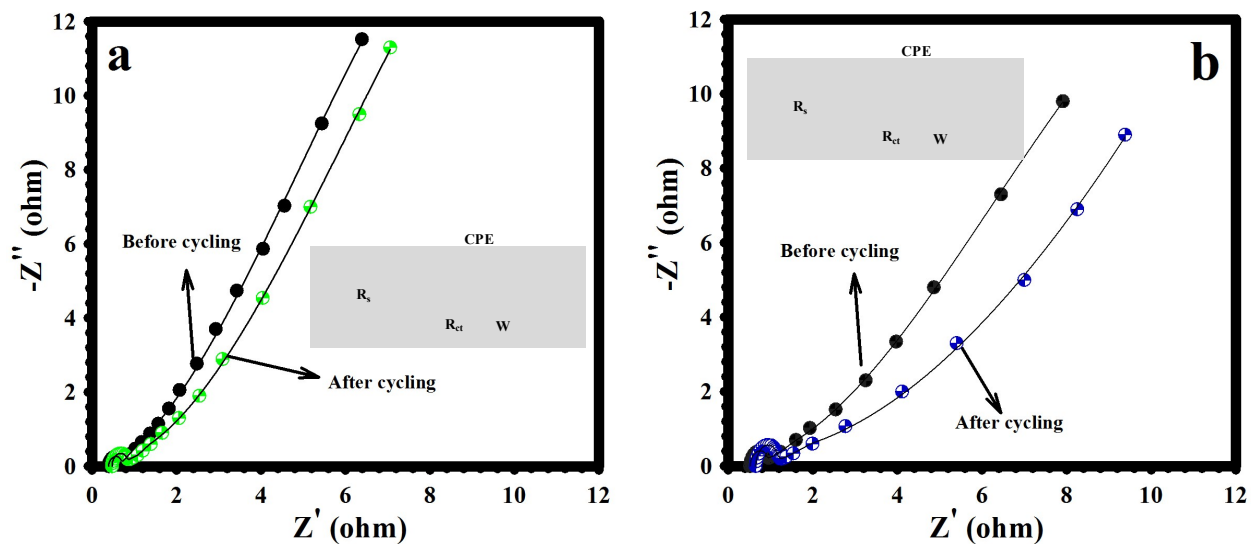

Fig. S9. (a) Nyquist graphs of the G/MSZCS-HS electrode before and after cycling. (b) Nyquist graphs of the MSZCS-HS electrode before and after cycling.

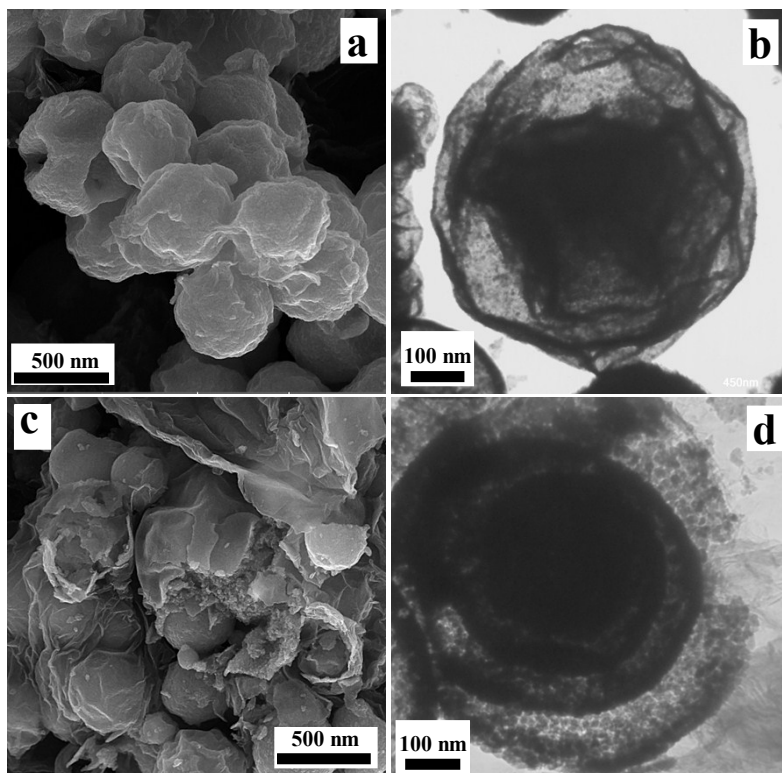

**Fig. S10.** (a) FE-SEM image of the MSZCS-HS electrode after cycling. (b) TEM image of the MSZCS-HS electrode after cycling. (c) FE-SEM image of the G/MSZCS-HS electrode after cycling. (d) TEM image of the G/MSZCS-HS electrode after cycling.

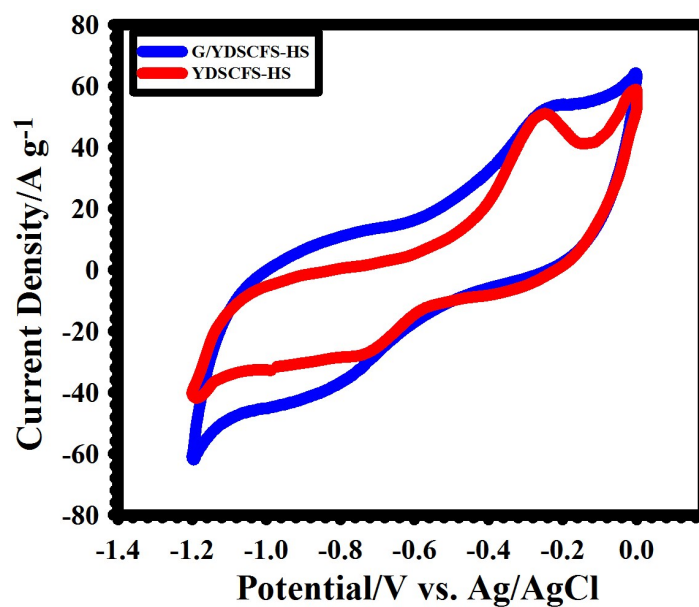

**Fig. S11.** CV curves of G/YDSCFS-HS and YDSCFS-HS.

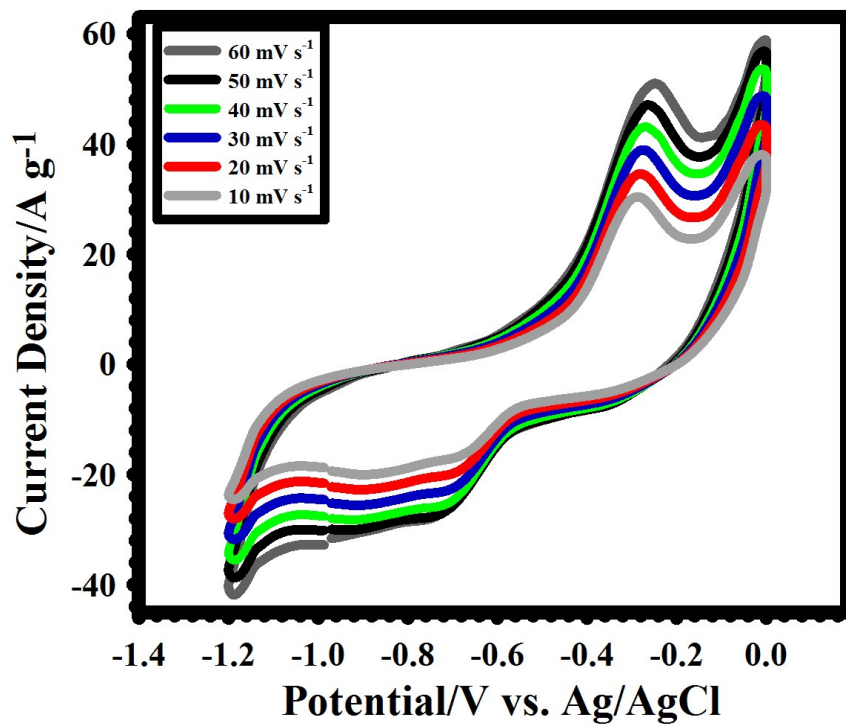

Fig. S12. CV curves of the YDSCFS-HS at various scan rates.

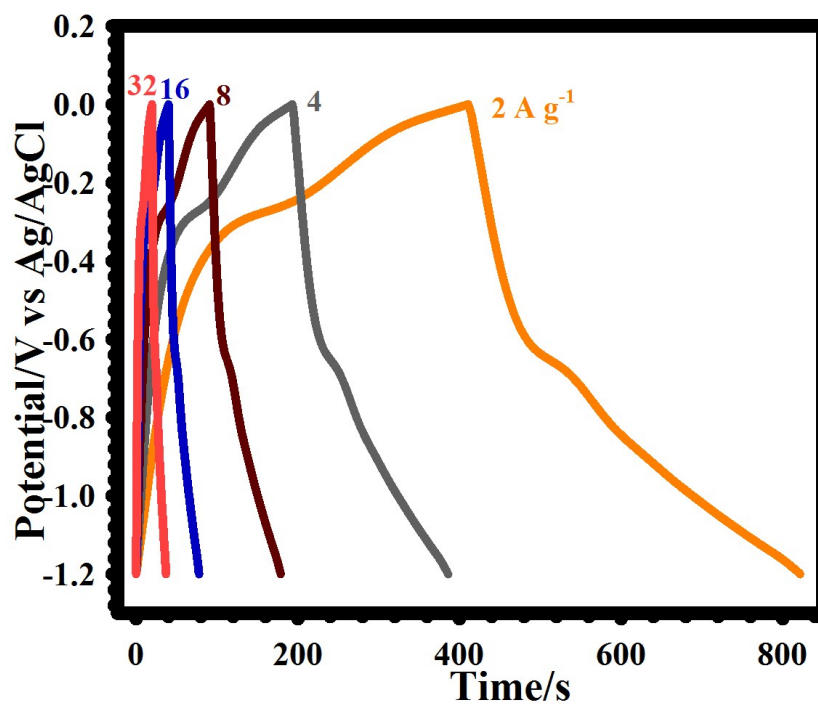

Fig. S13. GCD curves of the YDSCFS-HS at various current densities.

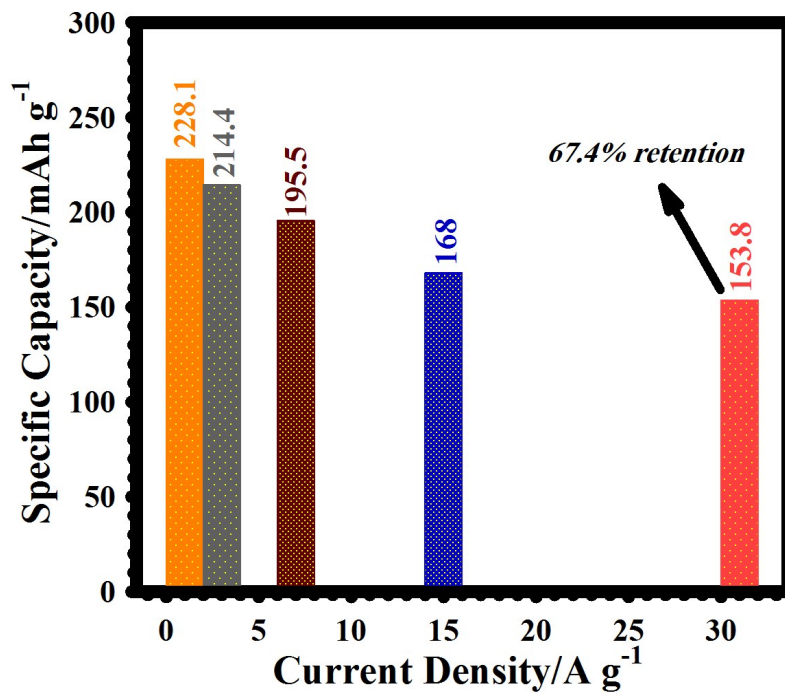

Fig. S14. Rate performance of the YDSCFS-HS.

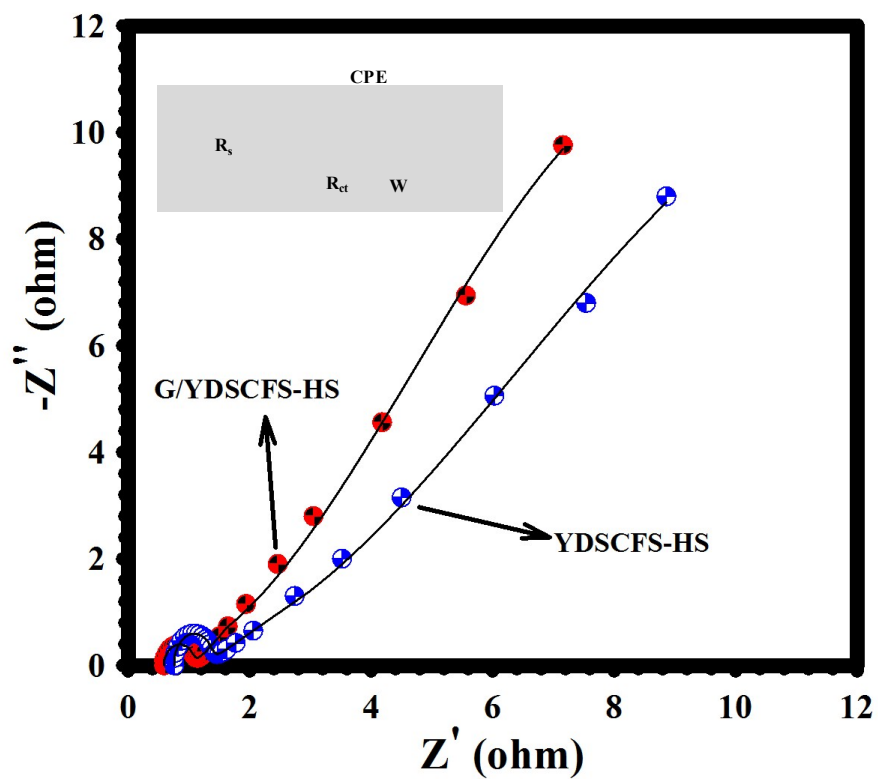

Fig. S15. Nyquist graphs of G/YDSCFS-HS and YDSCFS-HS electrodes.



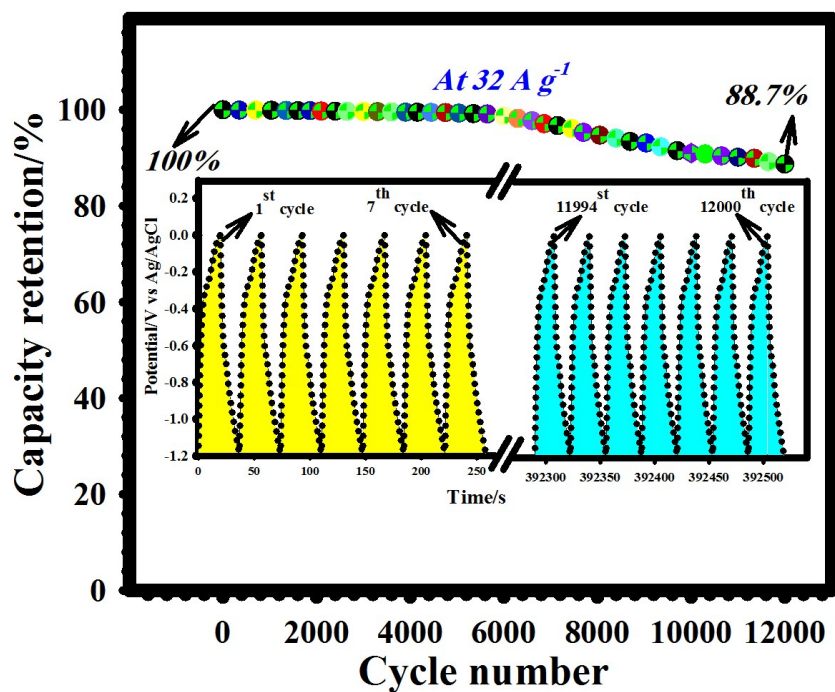

Fig. S16. Durability of the YDSCFS-HS electrode.

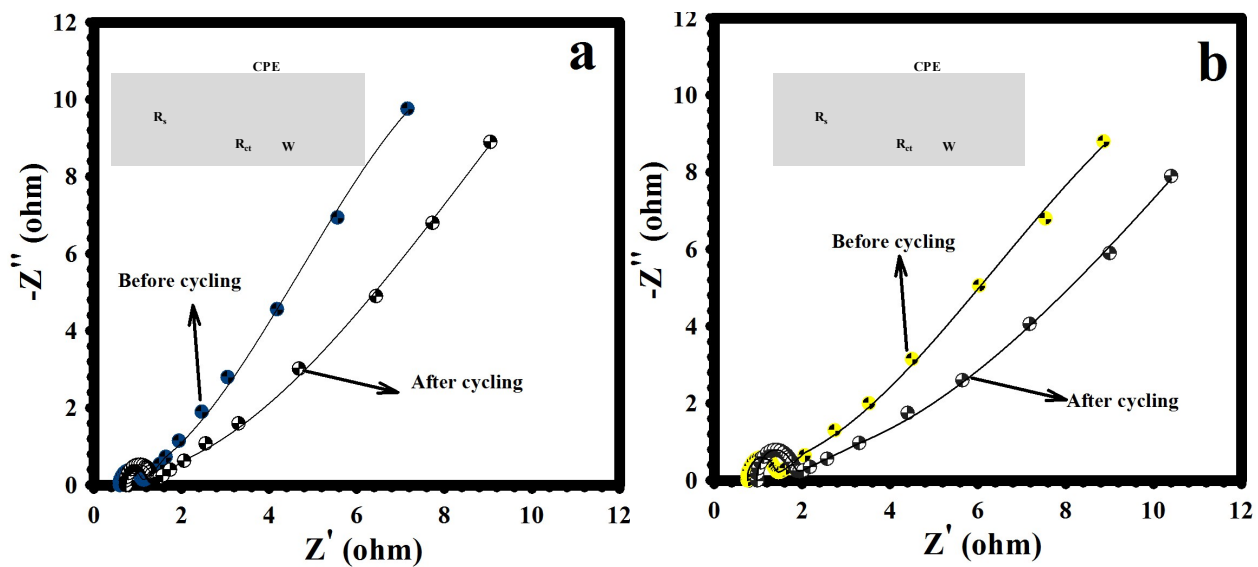

Fig. S17. (a) Nyquist graphs of the G/YDSCFS-HS electrode before and after cycling. (b) Nyquist graphs of the YDSCFS-HS electrode before and after cycling.

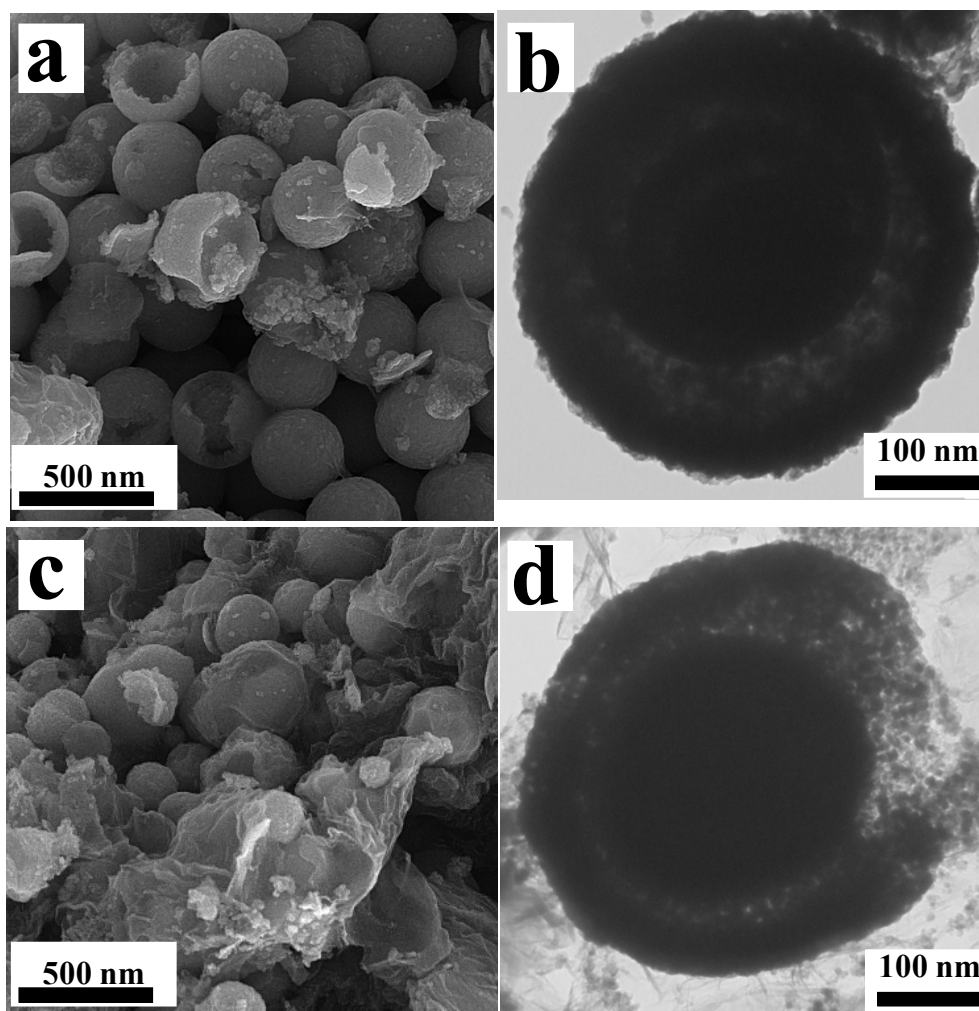

**Fig. S18.** (a) FE-SEM image of the YDSCFS-HS electrode after cycling. (b) TEM image of the YDSCFS-HS electrode after cycling. (c) FE-SEM image of the G/YDSCFS-HS electrode after cycling. (d) TEM image of the G/YDSCFS-HS electrode after cycling.

**Table S1.** Comparison of the electrochemical performance of G/MSZCS-HS electrode in three and two electrode systems with other previously reported electrodes.

| Composition              | Capacity 3 and 2 electrodes ( $mAh\ g^{-1}$ )               | Cycles, retention 2 and 3 electrode    | ED ( $Wh\ kg^{-1}$ ) 2 Electrode | Reference |
|--------------------------|-------------------------------------------------------------|----------------------------------------|----------------------------------|-----------|
| $MnCo_2O_{4.5}@Ni(OH)_2$ | 318 at 3 A $g^{-1}$ (3 E)<br>70.67 at 1 A $g^{-1}$ (2 E)    | 5000, 87.7% (3 E)<br>3000, 90.4% (2 E) | 56.53                            | 1         |
| $Co_3O_4$                | 209 at 1 A $g^{-1}$ (3 E)                                   | 3000, 90 (3 E)                         | 41.4                             | 2         |
| $NiCo_2S_4$              | 301.1 at 2 A $g^{-1}$ (3 E)<br>80.56 at 1 A $g^{-1}$ (2 E)  | 5000, 93.85% (2 E)                     | 48.65                            | 3         |
| Ni-MOF                   | 123.5 at 1 A $g^{-1}$ (3 E)                                 | 3000, 90.6% (2 E)                      | 55.8                             | 4         |
| $ZnCo_2O_4$              | 78.89 at 1 A $g^{-1}$ (3 E)<br>34.7 at .2 A $g^{-1}$ (2 E)  |                                        | 27.78                            | 5         |
| $Co_3O_4/Co(OH)_2$       | 184.9 at 1 A $g^{-1}$ (3 E)<br>58.9 at 4 A $g^{-1}$ (2 E)   | 5000, 90% (3 E)<br>5000, 91% (2 E)     | 37.6                             | 6         |
| Co-Cd-Se                 | 192 (3 E) at 1 A $g^{-1}$<br>85 (2 E) at 1 A $g^{-1}$       | 1000, 95.2% (3 E)<br>1000, 80.9% (2 E) | 57.6                             | 7         |
| G/MSZCS-HS               | 376.75 at 2 A $g^{-1}$ (3 E)<br>140.3 at 1 A $g^{-1}$ (2 E) | 12000, 96.8 (3 E)<br>12000, 91.7 (2 E) | 126.3                            | This work |

## References

- 1 Y.-L. Liu, C. Yan, G.-G. Wang, H.-Y. Zhang, L.-Y. Dang, B.-W. Wu, Z.-Q. Lin, X.-S. An and J. Han, *ACS Appl. Mater. Interfaces* 2019, **11**, 9984-9993.
- 2 L. Zhang, Y. Zhang, S. Huang, Y. Yuan, H. Li, Z. Jin, J. Wu, Q. Liao, L. Hu, J. Lu, S. Ruan and Y.-J. Zeng, *Electrochim. Acta* 2018, **281**, 189-197.
- 3 K. Zheng, G. Li and C. Xu, *Appl. Surf. Sci.* 2019, **490**, 137-144.
- 4 Y. Jiao, J. Pei, C. Yan, D. Chen, Y. Hu and G. Chen, *J. Mater. Chem. A*, 2016, **4**, 13344-13351.
- 5 Y. Shang, T. Xie, C. Ma, L. Su, Y. Gai, J. Liu and L. Gong, *Electrochim. Acta* 2018, **286**, 103-113.
- 6 G. Lee and J. Jang, *J. Power Sources* 2019, **423**, 115-124.
- 7 Z.-B. Zhai, K.-J. Huang and X. Wu, *Nano Energy*, 2018, **47**, 89-95.
